# Supplementary material
Source: publisher figshare collection journal article supplement (https://gsajournals.figshare.com/articles/dataset/_/9992360)

## Report

|                                 | EreAlp1.0  |
|---------------------------------|------------|
| # contigs ( $\geq 0$ bp)        | 2708       |
| # contigs ( $\geq 1000$ bp)     | 2660       |
| # contigs ( $\geq 5000$ bp)     | 1220       |
| # contigs ( $\geq 10000$ bp)    | 903        |
| # contigs ( $\geq 25000$ bp)    | 584        |
| # contigs ( $\geq 50000$ bp)    | 445        |
| Total length ( $\geq 0$ bp)     | 1041026391 |
| Total length ( $\geq 1000$ bp)  | 1040980009 |
| Total length ( $\geq 5000$ bp)  | 1038020128 |
| Total length ( $\geq 10000$ bp) | 1035747852 |
| Total length ( $\geq 25000$ bp) | 1030778160 |
| Total length ( $\geq 50000$ bp) | 1025949409 |
| # contigs                       | 2708       |
| Largest contig                  | 31807647   |
| Total length                    | 1041026391 |
| GC (%)                          | 42.23      |
| N50                             | 10588015   |
| N75                             | 3940266    |
| L50                             | 29         |
| L75                             | 70         |
| # N's per 100 kbp               | 3472.39    |

All statistics are based on contigs of size  $\geq 500$  bp, unless otherwise noted (e.g., "# contigs ( $\geq 0$  bp)" and "Total length ( $\geq 0$  bp)" include all contigs).

Nx

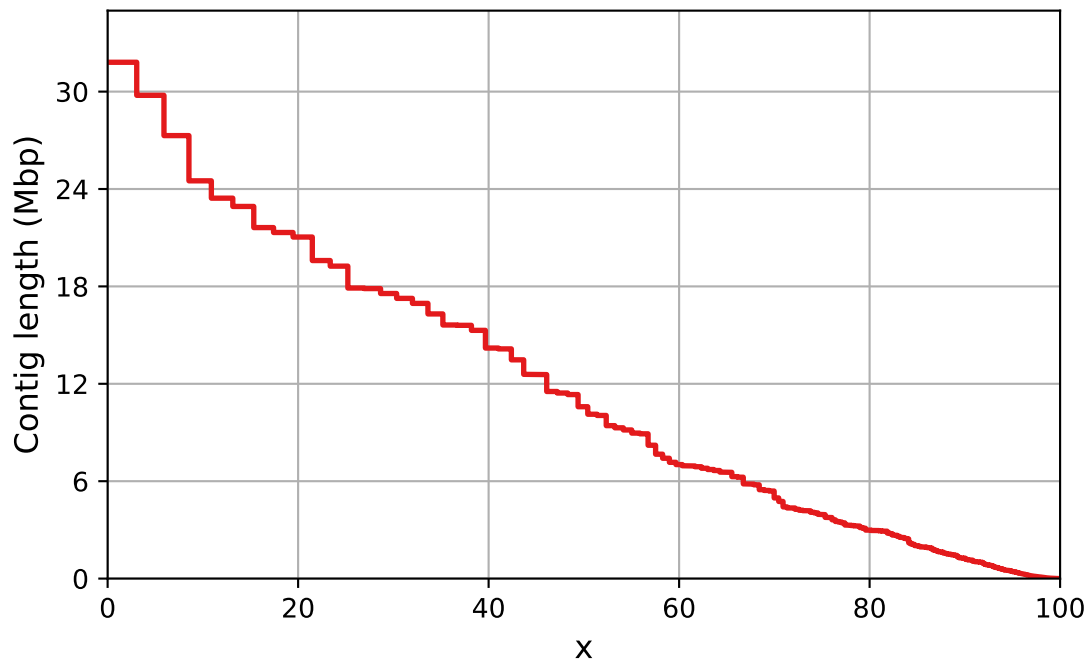

EreAlp1.0

Cumulative length

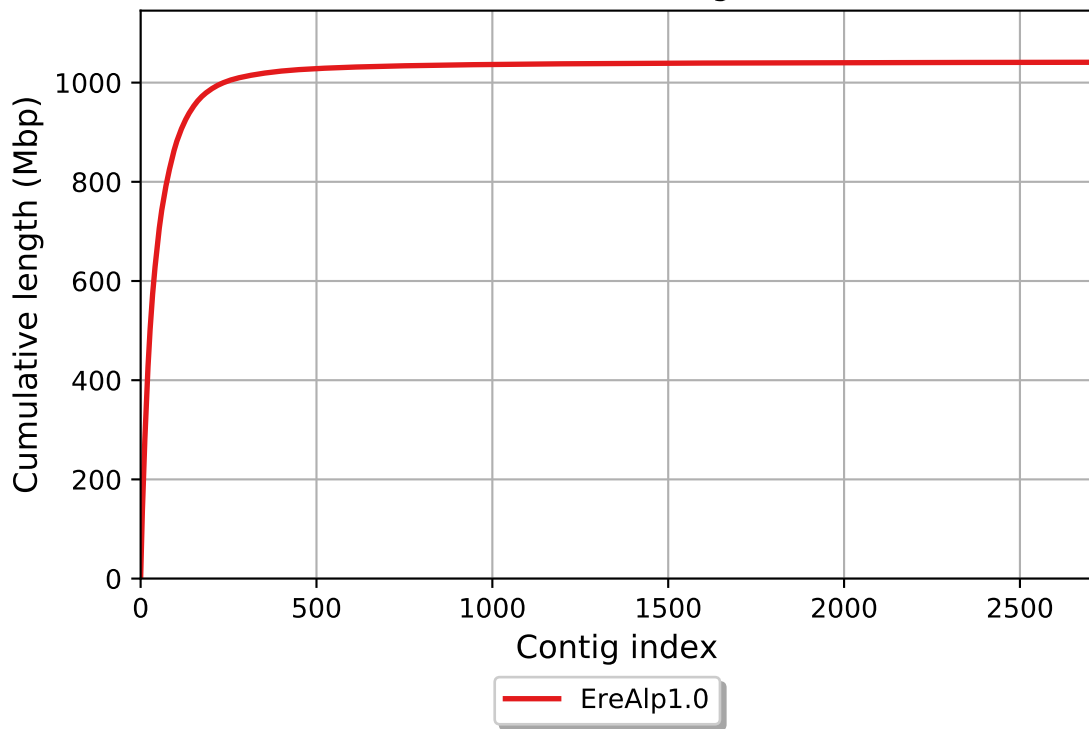

GC content

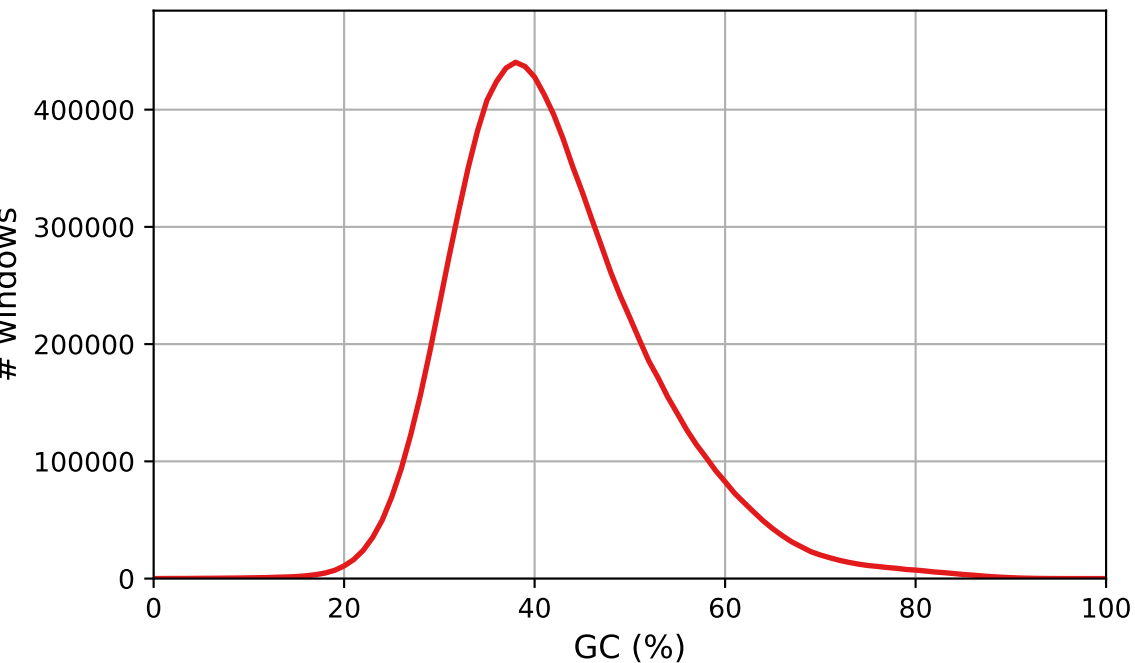

EreAlp1.0

EreAlp1.0 GC content

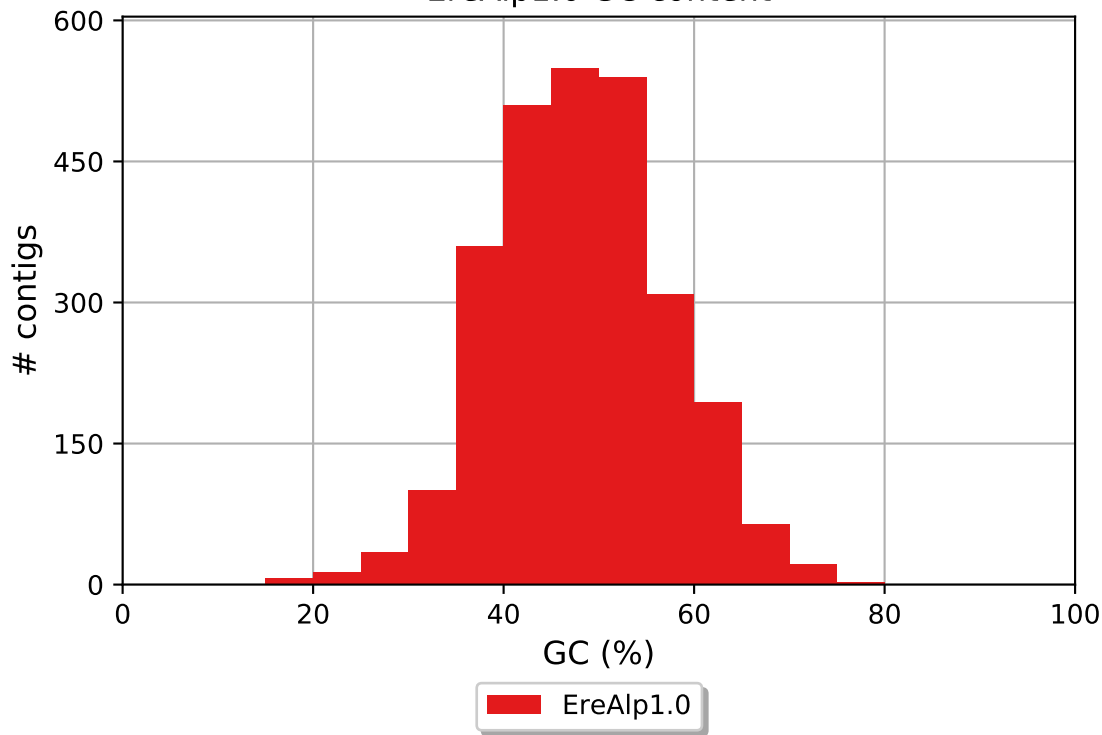

Supplement: Supplementary file 5 [file 1]
