# Supplementary material
Source: publisher figshare collection journal article supplement (https://gsajournals.figshare.com/articles/dataset/_/9992360)

Nx

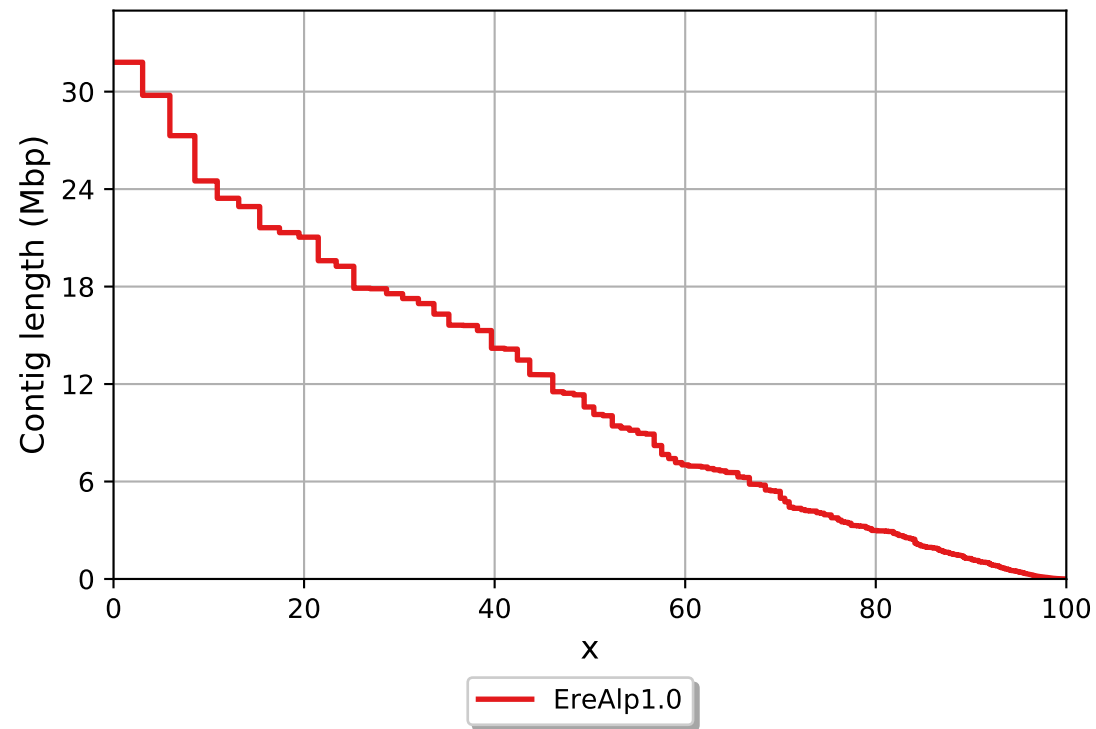

Supplement: Supplementary file 1 [file 1]

EreAlp1.0 GC content

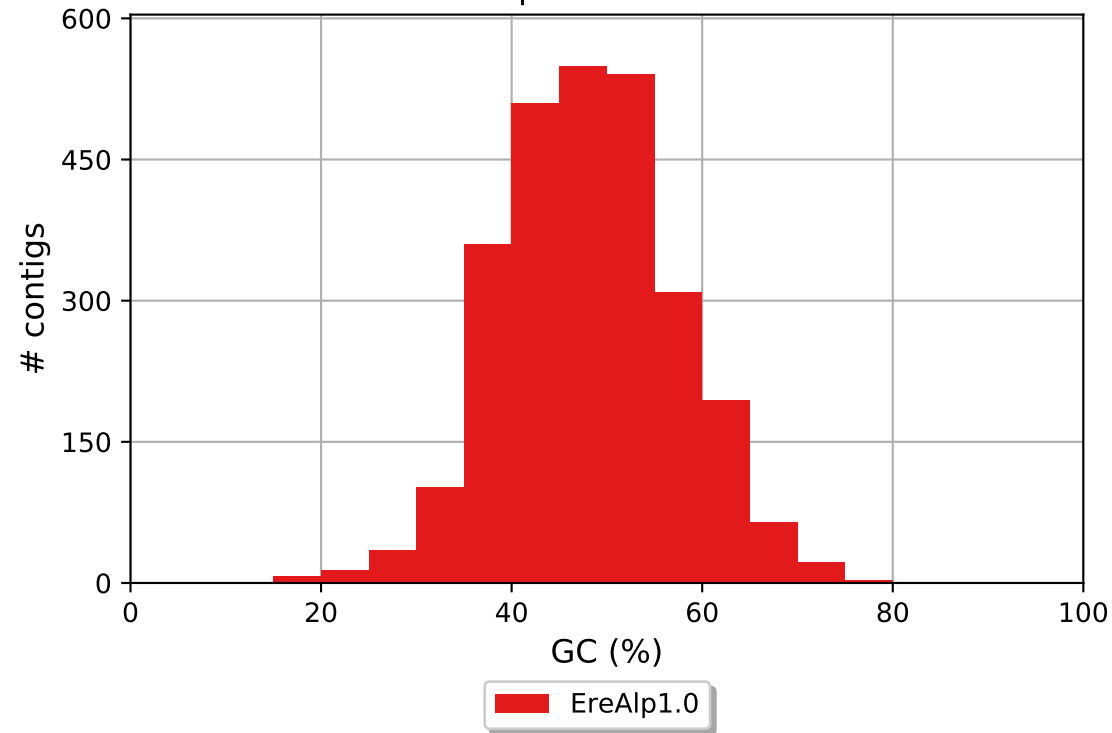

Supplement: Supplementary file 2 [file 1]

# GC content

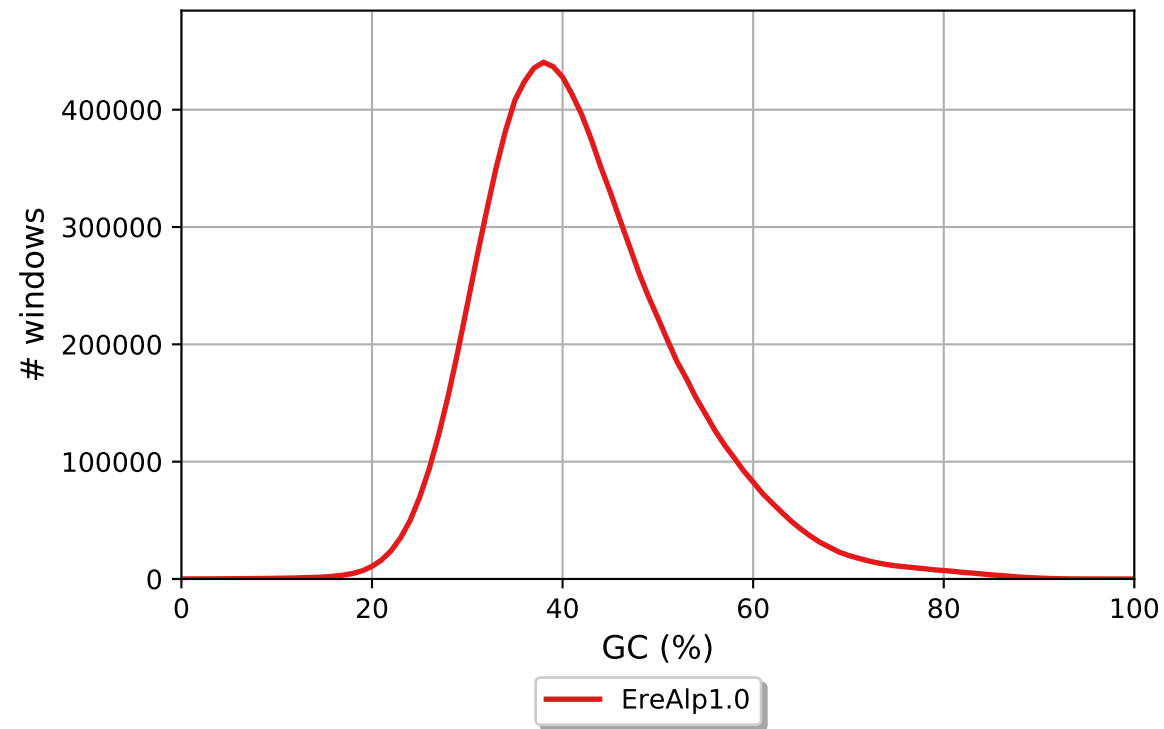

Supplement: Supplementary file 3 [file 1]

Cumulative length

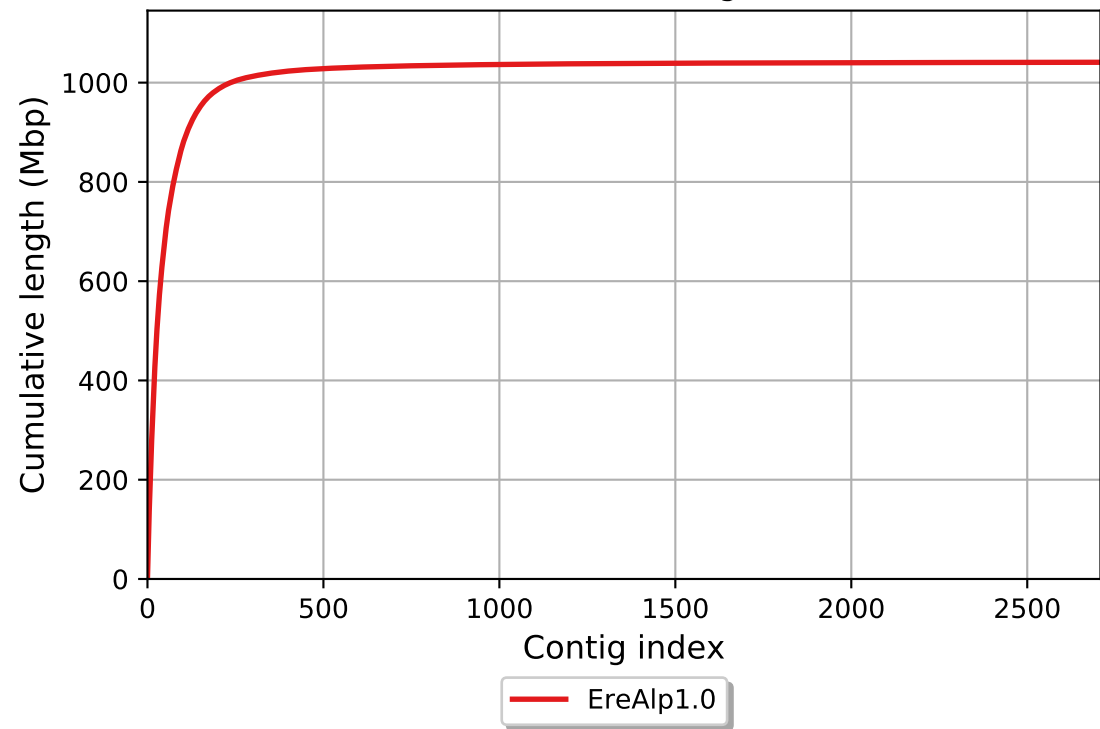

Supplement: Supplementary file 4 [file 1]
